# Supplementary material for: A multi-disciplinary analysis of the exceptional flood event of July 2021 in central Europe. Part 1: Event description and analysis
Source: Copernicus journal article supplement (doi:10.5194/nhess-2022-137), 2022-05-20
Supplement: Supplementary file [file nhess-2022-137-RC2-supplement.pdf]

## General comments

The paper “A multi-disciplinary analysis of the exceptional flood event of July 2021 in central Europe. Part 1: Event description and analysis” by Mohr et al. gives an overview of the flood event last year, with a special focus on hydrological, and hydro-morphological processes and mechanisms. The paper describes very well the event across various physical disciplines. The complex interaction between those could be analyzed in more detail. The aspects of social science regarding the flood event are not addressed, at least the paper should underline or refer to the high importance of risk culture (e.g. risk awareness, risk communication).

## Specific comments

L 1; L 16; L 69; L334, L744: Please think about if you want to use the term “natural disaster”. There is no disaster without human interference, so it’s never something “natural” Have a look at #nonaturaldisaster: <https://www.nonaturaldisasters.com/>

L 23: Figure 1 is mentioned here for the first time, but Figure 1 is currently in L 116. Why so far away?

L 35: displaced people?

L 39: in the meantime, flood hazard maps are updated see Roggenkamp & Herget. I would rather write the existing maps before and during the flood

L 107: see below – could you describe below more specific please?

## Technical corrections

L 38: only one week

L63: six month

L73; L74: (e.g. ....)

L74: erosion, and

L105: one hour, but can reach up to one minute -> Numbers from one to twelve are written out

L128: used by

L129: In its global uniform resolution configuration it is run twice daily -> check the grammar

L307: as early as

L310: were predicted more than two days

L320: two days

L339: - namely soil wetness - -> missing spaces

L344: three weeks

L371: erosion, and

L372; L389f; L401, L484: - .... - -> missing spaces

L408f: the peak flow

L523: floods are?

L632: infrastructural, and

L762: two days

L857: This helps to mitigate associated adverse effects -> missing . in the end
